RESEARCH ARTICLE

# Mothers treatment seeking intention for neonatal danger signs in northwest Ethiopia: A structural equation modeling

Tariku Nigatu Bogale<sup>1\*</sup>, Abebaw Gebeyehu Worku<sup>1</sup>, Alemayehu Worku Yalew<sup>2</sup>, Gashaw Andargie Bikis<sup>1</sup>, Zemene Tigabu Kebede<sup>3</sup>

**1** Institute of Public Health, University of Gondar, Gondar, Ethiopia, **2** School of Public Health, Addis Ababa University, Addis Ababa, Ethiopia, **3** Department of Pediatrics and Child Health, University of Gondar, Gondar, Ethiopia

\* [trknigatu@gmail.com](mailto:trknigatu@gmail.com)

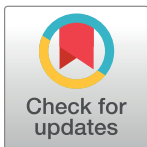

**OPEN ACCESS**

**Citation:** Bogale TN, Worku AG, Yalew AW, Bikis GA, Tigabu Kebede Z (2018) Mothers treatment seeking intention for neonatal danger signs in northwest Ethiopia: A structural equation modeling. PLoS ONE 13(12): e0209959. <https://doi.org/10.1371/journal.pone.0209959>

**Editor:** Aisha K. Yousafzai, Harvard TH Chan School of Public Health, UNITED STATES

**Received:** December 17, 2016

**Accepted:** December 14, 2018

**Published:** December 31, 2018

**Copyright:** © 2018 Bogale et al. This is an open access article distributed under the terms of the [Creative Commons Attribution License](https://creativecommons.org/licenses/by/4.0/), which permits unrestricted use, distribution, and reproduction in any medium, provided the original author and source are credited.

**Data Availability Statement:** Data cannot be shared publicly because this is part of an ongoing multi country study. Data access restriction is temporarily imposed by the Institute of Public Health, University of Gondar, ICCM project until the project is complete. Data are available from the Institute of Public Health, University of Gondar (contact via Dr. Kassahun Alemu, Director of the Institute of Public Health, University of Gondar at [kassalemu@gmail.com](mailto:kassalemu@gmail.com) or +251911752466) for researchers who meet the criteria for access to confidential data.

## Abstract

### Background

Neonatal mortality contributes to nearly half of under-five mortality in Ethiopia. Treatment seeking for newborn danger signs remains low despite correlations with neonatal mortality. This study tests a theoretical model of factors affecting mothers' treatment seeking intention for neonatal danger signs in northwest Ethiopia.

### Method

A cross sectional study was conducted from March 3–18, 2016 in northwest Ethiopia. A total of 2,158 pregnant women and women who had delivered in the past 6 months were interviewed. Latent variables; knowledge of neonatal danger signs (KDS), household level women empowerment (HLWE) and positive perception toward the behavior of health care providers (PPBHCP) were measured using a Five Point Likert Scale. Socioeconomic status (SES), number of antenatal care attendance, perceived cost of treatment (PCT), average distance to health facilities (ADHF) and treatment seeking intention (TSI) were observed variables in the study. A structural equation modeling was applied to test and estimate the hypothesized model of relationships among latent and observed variables and their direct and indirect effects on TSI.

### Result

KDS, PPBHCP, HLWE, and PCT showed direct, positive and significant association with TSI ( $\beta = 0.41, p < 0.001$ ,  $\beta = 0.08, p < 0.002$ ,  $\beta = 0.18, p < 0.001$ , and  $\beta = 0.06, p < 0.002$ , respectively). SES was not directly associated with TSI. However, it indirectly influenced TSI through three pathways; KDS, number of ANC attendance and HLWE ( $\beta = 0.05, p < 0.05$ ,  $\beta = 0.08, p < 0.001$  and  $\beta = 0.13, p < 0.001$ , respectively). Number of antenatal care was not directly associated with TSI. But indirectly, it affected TSI through its direct effect on KDS and PPBHCP ( $\beta = 0.05, p < 0.05$ ,  $\beta = 0.14, p < 0.001$ , respectively). PPBHCP and HLWE also showed indirect association with TSI through their direct effect on KDS ( $\beta = 0.37, p < 0.001$ ,

**Funding:** This is part of a Ph.D. study manuscript supported by the university of Gondar Projects. the University is following whether findings are presented and published. The university has no role in the design, data collection, analysis and interpretation of the data and in writing the manuscript. All the statements and findings are the responsibility of the investigators.

**Competing interests:** The authors have declared that no competing interests exist.

$\beta = 0.36$ ,  $p < 0.001$ , respectively). All in all, the model fitted the sample data and explained 31% of the variance in TSI.

## Conclusion

PPBHCP, HLWE, PCT and KDS were associated with mothers' TSI for newborn danger signs.

## Background

Globally, around 44% of under-five deaths is due to neonatal mortality [1–3]. Around two-third of neonatal deaths occur in just 10 countries[3]. The majority of neonatal deaths occur at home in resource limited settings including Ethiopia[4,5]. Compared to other developing countries, Ethiopia has one of the highest neonatal mortality rates (29 deaths per 1000 live births) contributing to nearly half of under-five deaths in the country[6].

Evidences show that there is correlation between treatment seeking at health facilities and neonatal mortality[7–9]. Meaning, death of newborns is preventable when appropriate and timely care is sought[10]. A study also showed that a third of neonatal deaths can be prevented by caring for small and ill newborns [3]. However, care seeking behavior for neonatal illnesses is low in low and middle income countries [11]. Health seeking behavior and utilization is also affected by several factors including; physical, cultural and political factors [12], low income [13], knowledge about the severity of illness [14], cost of treatment, staff friendliness, poor communication with staff and distance to health facility [15]. Treatment seeking also varies between sexes and places of residence. Treatment seeking for male neonate is better than female neonate[16].

UNICEF and WHO define the following symptoms as danger signs in newborns: 1) Not feeding since birth or stopped feeding, 2) Convulsions, 3) Respiratory rate of 60 or more, 4) Severe chest in-drawing, 5) Temperature  $\geq 37.5^{\circ}\text{C}$ , 6) Temperature  $\leq 35.5^{\circ}\text{C}$ , 7) movement only when stimulated, or not even when stimulated, 8.)Yellow soles (sign of jaundice), 9) Reddened or pus draining umbilicus and, 10) Reddened or pus draining eyes. According to WHO, these symptoms are believed to be easily recognizable by community health workers or possibly mothers [17]. Evidences show that caretakers who don't recognize these dangers signs fail to seek appropriate treatment for the illnesses [18,19].

The Ethiopian Ministry of Health, through its flagship health extension program, prepared an illustrated booklet called Family Health Card (FHC). The FHC contains recommended action points and key health messages on maternal, newborn and child health. It also contains messages on neonatal danger signs to help families recognize neonatal danger signs and seek prompt treatment [20].

Despite the implementation of the FHC and other newborn focused interventions such as Community Based Newborn Care (CBNC), integrated Community Case Management (iCCM), and Integrated Management of Newborn and Childhood Illnesses (IMNCI), Ethiopia still has one of the highest neonatal mortality rates in the world[21]. Modern treatment seeking for neonatal danger signs is also negatively influenced by social, cultural and religious factors in the country[22–24].

Even though there is evidence of a link between treatment seeking and neonatal mortality, there is scarcity of evidence on the factors that determine treatment seeking for neonatal danger signs. In addition, previous studies assume summative relationships among predictor

variables and did not investigate their inter-correlations [16,25–27]. This study, however, hypothesized a theoretical model of treatment seeking intention. The model applies a robust methodology called structural equation modeling that simultaneously tests and estimates effects of variables and their inter-relationships in determining mothers' treatment seeking intention for newborn danger signs.

## Methods and materials

### Study design, setting and source population

A cross sectional community-based study was conducted from March 3–18, 2016 in North Gondar Zone of Ethiopia. North Gondar is in Amhara region located in the northwest part of the country [28]. The zone has 24 woredas (districts). According to the Central Statistical Agency (CSA), in 2014, the zone's projected population based on the 2007 national population and housing census was 3,441,885 of which 1,741,549 were males [29]. As of 2016, the zone has 9 government hospitals, 126 health centers and 563 health posts. There are also many private clinics most of them located in urban areas.

### Study population and variables

Pregnant women and women who had delivered (stillbirth or livebirth) in the past 6 months were included in the study. These groups of women are targets of different information on newborn care from formal (e.g. the FHC and health facilities) and informal (e.g. community and family members) sources during and after pregnancy. Women who delivered in the past 6 months were included to reduce memory bias.

### Hypothesized theoretical model

A hypothesized relationship was constructed among latent and observed variables based on literature review, plausibility of relationship and the authors experience (Fig 1). The following evidences supported the development of the hypothesized theoretical model:

Socio-economic status (SES) is associated with caretakers' treatment seeking [12–14,19,30]. number of ANC visits is associated with knowledge of danger sign [30], wealth status [31], and treatment seeking intention [32]. Treatment seeking for newborn illnesses is associated with perceived behavior of health care providers [11,19,33], distance to health facilities [14], cost of treatment [15] and women's empowerment [34,35].

TSI in this model is used as a proxy measure for treatment seeking behavior [36–38]. The model has three constructs also called latent variables or factors (PPBHCP, HLWE, and KDS) represented by circles and five observed variables (SES, number of ANC attendance, ADHF, PCT and TSI) represented by rectangles. The latent factors represent shared variances of items or indicator variables. Lines indicate relationships between the variables. Lack of a line connecting two variables implies no hypothesized relationship [39].

### Measurements and tools in the questionnaire

**Measurements.** Items for all latent and some observed variables were measured using a Five Point Likert Scale: strongly disagree = 1, disagree = 2, neutral = 3, agree = 4 and strongly agree = 5. The items were asked in affirmative statements to which respondents replied. As scoring increased from 1 to 5, it denoted higher score in the latent and the observed variables. Some items were reverse coded to maintain this assumption.

To help score the Likert Scale easily, respondents were instructed by interviewers to use the five digits of the right hand fingers to select one of the five responses; moving from the little

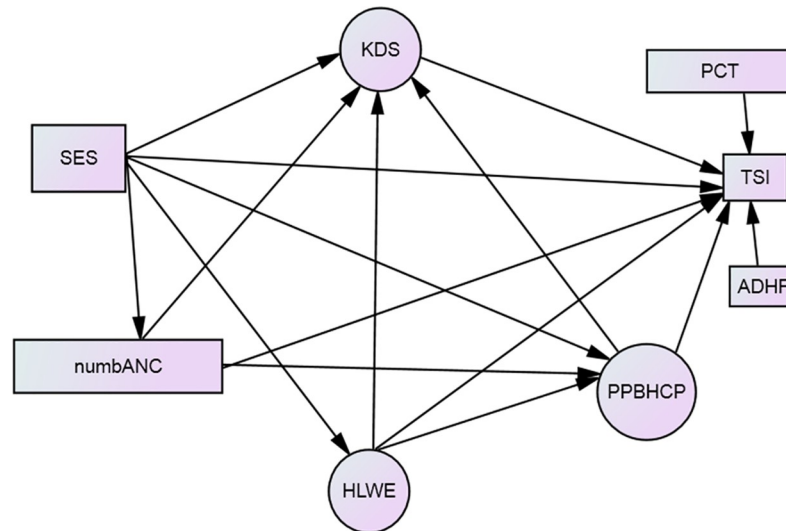

**Fig 1. Hypothesized structural model for mother’s treatment seeking intention for neonatal danger signs** Keys: SES: socioeconomic status, numbANC = number of ANC attendance, KDS = knowledge of danger signs, PCT = perceived cost of treatment, TSI = treatment seeking intention, ADHF = average distance to health facility, PPBHCP = positive perceived behavior of health care providers, HLWE = household level women empowerment.

<https://doi.org/10.1371/journal.pone.0209959.g001>

finger to the thumb representing increasing level of agreement; strongly disagree (little finger), disagree (ring finger), neutral (middle finger), agree (index finger), and strongly agree (thumb), respectively. Trained interviewers used their right hands to help each respondent score the Likert Scale using each questions.

**Latent variables measurement.** Knowledge of dangers signs (KDS): Mothers level of agreement with the WHO defined danger signs was measured with ten items. Each item represented one danger sign. The level of agreement to whether a newborn illness symptom defines a danger sign or not was measured using the Five Point Liker Scale. No mention was made to the women whether the symptoms were defined as dangers signs by WHO.

Household level women’s empowerment (HLWE): This was measured by two items; level of partner support and household level women’s decision making (HDM). The items were; (1) My husband/partner is supportive if I make decisions to take my sick newborn to treatment even in his absence, and (2) I can make decisions, alone or with my husband/partner, concerning household resources and my family.

Positive perception toward behavior of health care providers (PPBHCP): PPBHCP was measured by items used to measure respectful and non-abusive facility based care for maternity services[40]. (1) Health providers discriminate patients (reverse coded), (2) Health providers abuse patients (reverse coded), (3) Health providers create unnecessary delays to give care (reverse coded), (4) Health providers give enough time to listen to our worries (5) Health providers explain procedures before treatment and, (6) Health providers give confidential care or services.

**Observed variables measurement.** Socioeconomic status (SES): Principal component analysis (PCA) was used to measure SES. Variables included; ownership of house, household assets (possession of animals, farmland, bank account and utilities), household characteristics (what the floor, the wall and the roof is made of and possession of latrines and its hygiene status),and amenities (presence of electricity, source of drinking water, the light source and the type of fuel the household use). The household characteristics and amenities were dichotomized as improved and not improved and coded as 1 = improved and 0 = unimproved. The SES index was constructed separately for urban and rural areas. The SES indices were weighted

for urban and rural areas and then combined to produce a single SES. The SES was ranked in to quintiles and used as observed variable.

Treatment seeking intention (TSI): TSI was measured by the mother's level of agreement to the item; I always take my newborn to health facility for treatment of illnesses. The illness symptoms that define danger signs were mentioned without telling the respondents that the symptoms were defined as danger signs by WHO. The agreement level was scored using a Five Point Likert Scale.

Perceived cost of treatment (PCT): To measure what cost mothers think newborn danger sign treatment would entail, mothers were asked for their agreement to the item: The cost for the treatment and care for newborn danger signs is fair, or there is no cost. The response was scaled in a range of 1 to 5, similar to TSI.

Average distance to the nearest health facility (ADHF): The average distance to the nearest health post and health center was taken. Distance from health post to each village was obtained from health posts and health centers.

Number of ANC attendance(numANC): The number of ANC attendance, as reported by mothers, for the current (for pregnant women) or last pregnancy (for those who delivered in the last six months) at a health post or a health center.

### Reliability analysis for measurement items

Reliability analysis was used to check for internal consistency of items used in the measurement of the latent variables. Items with corrected item-to-total correlation of less than 0.30 and alpha if item deleted greater than the overall alpha were used as criteria to delete items. Cronbach's alpha measures the extent to which all the items in a test measure the same concept or construct and hence it is connected to the inter-relatedness of the items within the test[41].

Higher Cronbach's alpha value does not guarantee unidimensionality of items[41]. Dimensionality of the items was tested using PCA. All items loaded on a single construct which they were initially supposed to measure. Accordingly, the Cronbachs alpha coefficient for KDS, PBHCP, and HLWE were 0.85, 0.80, and 0.79, respectively.

### Sample size, sampling and data collection techniques

Sample size was determined using estimable parameter to cases ratio of 1:30 to get more stable estimates[42]. There were 57 free estimable parameters in the model. Hence, the sample size was calculated as; 57 multiplied by 30 which equals 1,710. This study was conducted as part of a multicountry enhanced iCCM study which had adequate sample size ( $n = 2,158$ ).

A multistage cluster sampling technique was used to select pregnant women and women who had delivered (stillbirth or livebirth in the past six months prior to the data collection time. First, 39 kebeles (the smallest administrative units) were randomly selected from three districts (Debarq, Dabat and Wogera) proportional to the size of the districts. Then, villages "Gots" from the selected kebeles were randomly selected. Data was collected from all households "Got" where there were eligible women.

Fifty four data collectors and five supervisors, all of them with at least first degree in health sciences, were recruited and trained for two days. A pretested structured questionnaire was used to collect data.

### Data analysis and modeling

The data was entered into EpiData Version 3.1. The database was exported to IBM SPSS version 20 and cleaning was done by running frequencies and descriptive statistics. The cleaned data was checked for outliers, nonlinearity, and multivariate normality. Analysis of Moment Structure (AMOS), add-in software within SPSS, was used for the analysis.

Internal consistency of the measurement items was assessed using Cronbach's Alpha. Structural equation modeling (SEM) was used to test and estimate the relationships between variables and their pathways of influence on treatment seeking intention.

The hypothesized model was defined a priori (model specification) based on theory, previous analytic researches and plausibility of relationships (Fig 1). The relationships between variables in the hypothesized model are shown by the following equations:

$$TSI = \beta_0 + \beta_1 KDS + \beta_2 PPBHCP + \beta_3 SES + \beta_4 numbANC + \beta_5 HLWE + \beta_6 ADHF + \beta_7 PCT + D_1$$

$$KDS = \beta_{00} + \beta_8 PPBHCP + \beta_9 SES + \beta_{10} numbANC + \beta_{11} HLWE + D_2$$

$$PPBHCP = \beta_{000} + \beta_{12} SES + \beta_{13} numbANC + \beta_{14} HLWE + D_3$$

$$HLWE = \beta_{0000} + \beta_{15} SES + D_4$$

$$numbANC = \beta_{00000} + \beta_{16} SES + D_5$$

The  $\beta$ s (betas) represent the change in the dependent variables for a unit change in the value of the corresponding predictor variable keeping other variables constant. The  $D$ s in each equation denote the disturbance; part of the total variance that is not explained by the particular model.

Model identification was checked using the degree of freedom (DF = 219). When  $DF > 0$ , it means that the model is over identified and unique parameter estimates can be calculated [42]. The regression weights ( $\beta$  coefficients or path coefficients) and factor loadings were determined using maximum likelihood estimation (model estimation). Evaluation of model fit was made using multiple fit indices. Goodness of fit index (GFI) and adjusted goodness of fit index (AGFI) of values  $> 90$  and root mean square error of approximation (RMSEA) of  $< 0.06$  were taken as a cut-off point (model testing) [43]. Re-specification of the hypothesized model, guided by modification indices, was made when plausible and theoretically justifiable. The total model R-square indicates the percentage of variance explained in the dependent variable (TSI).

## Ethical considerations

The ethical review board of the University of Gondar reviewed and approved the study. Permission was obtained from local administrations in the study area. Oral informed consent was sought from study subjects. The respondents were invited to participate voluntarily after informing them the potential benefits and harms involved in the study, the confidentiality and the possibility of withdrawing from the interview even without giving reasons. The University's ethical review board approved the consent procedure. All interviews were made in private settings.

## Results

### Respondents' characteristics

A total of 2,158 mothers were included in the study. The majority, 1,982 (92%), of the respondents resided in rural areas. Nearly a third, 725 (33.6%), were young women (15–24). The median (IQR) age of the women was 27 (10) years.

The median number of children ever born (IQR) among the respondents was 3 (1). More than half, 1,167 (54.1%), of the women delivered in the past six months prior to the data collection time. More than half, 656 (56.2%), of them delivered at home. The majority of the women, 1,280 (59.3%), attended two or more antenatal care during the current or last pregnancy. The majority of the women, 1,775 (82.3%), lived within a 10 kilometer radius, with an average distance ( $\pm$ SD) of 6.9 ( $\pm$ 6.3) Kilometers, from the nearest health facility.

Farming was the main source of income for more than 93% of the households. Nearly two thirds, 1,413 (65.5%), of the women and half, 1,069(49.5%), of their partners did not go to school. Nearly all of the study participants, 2,126(98.5%), were followers of Orthodox Christianity (Table 1).

The socio-economic status of each women was assigned a standardized score. All the samples were ranked according to that score which was then divided into quintiles. The first principal components for the common, urban and rural wealth indices explained 16.2%, 20.7% and 17% of the total variances in the dataset.

## Evaluation of the proposed model

**Model fit indices.** Initial model testing did not meet cutoff points for the selected fit indices; GFI, AGFI and RMSEA were 0.901, 0.879 and 0.69, respectively. Improvement in the model fit indices was shown when freeing the restriction between the error terms of selected items that measure the same construct. Shared influences other than the underlying constructs could explain the correlation between the error variances.

The revised model fitted with the sample data very well. Goodness of fit index (GFI) was 0.934 and adjusted goodness of fit index (AGFI) was 0.915. Root Mean Error of Approximation (RMSEA) was 0.057. The commonly applied test (Chi square test) was ignored since it is sensitive to large sample size[44].

**Measurement model.** Confirmatory factor analysis was done with maximum likelihood estimation to test the significance of the hypothesized measurement model. The items used to measure the constructs were all significant at  $p$  value  $<0.001$ . This shows the significance of the items in measuring their respective underlying constructs (Table 2).

**Structural model.** The standardized path coefficients show the direction and magnitude of association between two variables. Accordingly, knowledge of neonatal danger signs (KDS), positive perceived behavior of health care providers (PPBHCP), household level woman empowerment (HLWE), and perceived cost of treatment (PCT) showed direct, positive and significant association with treatment seeking intention(TSI) ( $\beta = 0.41, p<0.001, \beta = 0.08, p<0.002, \beta = 0.18, p<0.001, \text{ and } \beta = 0.06, p<0.002$ , respectively). Socioeconomic status (SES) was not directly associated with TSI. However, it indirectly influenced TSI through three pathways; KDS, number of ANC attendance, and HLWE ( $\beta = 0.05, p<0.05, \beta = 0.08, p<0.001$  and  $\beta = 0.13, p<0.001$ , respectively). Number of antenatal care was not directly associated with TSI. But indirectly, it affected TSI through its direct, significant and positive association with KDS and PPBHCP ( $\beta = 0.05, p<0.05, \beta = 0.14, p<0.001$ , respectively). PPBHCP and HLWE also showed indirect associations with TSI through their direct, significant and positive association with KDS ( $\beta = 0.37, p<0.001, \beta = 0.36, p<0.001$ , respectively). Average distance to health facilities (ADHF) was not associated with TSI. All in all, 31% of the variation in TSI was explained by the model (Table 3 and Fig 2).

## Discussion

Several studies reported that delay in treatment seeking and not seeking any care at all significantly contribute to large number of child deaths in developing countries[45–49]. Treatment

**Table 1. Socio-demographic profile of study participants, northwest Ethiopia, March 2016.**

| Variables                                                                           | No      | Percent |
|-------------------------------------------------------------------------------------|---------|---------|
| <b>Place of Residence (n = 2158)</b>                                                |         |         |
| Urban                                                                               | 173     | 8       |
| Rural                                                                               | 1985    | 92      |
| <b>Maternal age (n = 2158)</b>                                                      |         |         |
| 15–19 years                                                                         | 221     | 10.2    |
| 20–24 years                                                                         | 504     | 23.4    |
| 25–29 years                                                                         | 576     | 26.7    |
| 30–39 years                                                                         | 726     | 33.6    |
| 40–49 years                                                                         | 131     | 6       |
| Median (IQR)                                                                        | 27 (10) |         |
| <b>Number of children ever born (n = 2158)</b>                                      |         |         |
| 0                                                                                   | 317     | 14.7    |
| 1                                                                                   | 230     | 10.7    |
| 2                                                                                   | 376     | 17.4    |
| 3                                                                                   | 348     | 16.1    |
| 4 or more                                                                           | 887     | 41.1    |
| Median (IQR) (SD)                                                                   | 3(1))   |         |
| <b>Number of ANC visits in the current or last pregnancy (n = 2158)</b>             |         |         |
| 0                                                                                   | 576     | 26.7    |
| 1                                                                                   | 302     | 14      |
| 2 or more                                                                           | 1280    | 59      |
| <b>Marital status (n = 2158)</b>                                                    |         |         |
| Single                                                                              | 34      | 1.6     |
| Married                                                                             | 2046    | 94.8    |
| Others (divorced, separated, widowed)                                               | 78      | 3.6     |
| <b>Occupation of mother (n = 2158)</b>                                              |         |         |
| Farmer                                                                              | 2024    | 93.8    |
| Merchant                                                                            | 50      | 2.4     |
| Others (daily laborer, government employee etc)                                     | 84      | 3.8     |
| <b>Occupation of father (n = 2158)</b>                                              |         |         |
| Farmer                                                                              | 2041    | 94.6    |
| Others (Merchant daily laborer, government employee)                                | 117     | 5.4     |
| <b>Mothers School Attendance (2158)</b>                                             |         |         |
| Yes                                                                                 | 745     | 34.5    |
| No                                                                                  | 1413    | 65.5    |
| <b>Educational status of mother (n = 2158)</b>                                      |         |         |
| <b>Illiterate (none)</b>                                                            |         |         |
| Able to read and write                                                              | 68      | 3.2     |
| 1-4 <sup>th</sup> grade                                                             | 235     | 10.9    |
| 5-8 <sup>th</sup> grade                                                             | 279     | 12.9    |
| 9-10 <sup>th</sup> grade                                                            | 141     | 6.5     |
| Higher than 10 <sup>th</sup> grade (11-12 <sup>th</sup> grade and higher education) | 22      | 1       |
| <b>Fathers school attendance (n = 2158)</b>                                         |         |         |
| Yes                                                                                 | 1089    | 50.5    |
| No                                                                                  | 1069    | 49.5    |
| <b>Educational status of father (n = 2158)</b>                                      |         |         |
| <b>Illiterate (None)</b>                                                            |         |         |
|                                                                                     | 1069    | 49.5    |

(Continued)



**Table 1.** (Continued)

| Variables                          | No   | Percent |
|------------------------------------|------|---------|
| Able to read and write             | 256  | 11.9    |
| 1-4 <sup>th</sup> grade            | 381  | 17.7    |
| 5-8 <sup>th</sup> grade            | 302  | 14      |
| 9-10 <sup>th</sup> grade           | 117  | 5.4     |
| Higher than 10 <sup>th</sup> grade | 33   | 1.6     |
| <b>Religion (n = 2158)</b>         |      |         |
| Orthodox Christianity              | 2126 | 98.5    |
| Muslim                             | 32   | 1.5     |

<https://doi.org/10.1371/journal.pone.0209959.t001>

seeking is a multidimensional phenomenon influenced by many factors[50]. Hence, better understanding of the dimensions and their relationships contribute to reductions in child mortality.

**Table 2. Parameter estimates of items of latent variables used in the hypothesized measurement model, northwest Ethiopia, March 2016.**

| Code                                                                                | Constructs and indicators                                                                                  | Standardized factor loadings |
|-------------------------------------------------------------------------------------|------------------------------------------------------------------------------------------------------------|------------------------------|
| <b>Knowledge of danger signs (KDS) (n = 2158)</b>                                   |                                                                                                            |                              |
| Q404                                                                                | Inability to suck is a danger sign                                                                         | 0.62***                      |
| Q405                                                                                | Fever is a danger sign                                                                                     | 0.62***                      |
| Q406                                                                                | Low temperature is a danger sign                                                                           | 0.46***                      |
| Q407                                                                                | Abnormal body movement is a danger sign                                                                    | 0.68***                      |
| Q408                                                                                | Fast breathing is a danger sign                                                                            | 0.62***                      |
| Q409                                                                                | Difficulty in breathing is a danger sign                                                                   | 0.70***                      |
| Q410                                                                                | Red, swollen eyelids and pus discharge from the eyes are danger signs                                      | 0.61***                      |
| Q411                                                                                | Redness, pus or foul odor around the cord or umbilicus are danger signs                                    | 0.60***                      |
| Q412                                                                                | Yellow skin, soles and palms is a danger sign                                                              | 0.53***                      |
| Q413                                                                                | Floppiness or absence of movement unless stimulated is a danger sign                                       | 0.57***                      |
| <b>Positive Perceived Behavior toward health care providers (PPBHCP) (n = 2158)</b> |                                                                                                            |                              |
| Q414                                                                                | Health care providers at the health center /hospital provide confidential care                             | 0.46***                      |
| Q415                                                                                | Health care providers at health center/hospital discriminate patients (reverse coded)                      | 0.73***                      |
| Q416                                                                                | Health care providers at the health center/hospital physically abuse patients (reverse coded)              | 0.80***                      |
| Q417                                                                                | Health care providers at the health center/hospital create unnecessary delays to give care (reverse coded) | 0.57***                      |
| Q418                                                                                | Health care providers at the health center/hospital give us enough time to listen to our worries           | 0.62***                      |
| Q419                                                                                | Health care providers at the health center/hospital explain procedures to us before treatment              | 0.55***                      |
| <b>Household level mother women’s Empowerment (HLWE) (n = 2158)</b>                 |                                                                                                            |                              |
| Q420                                                                                | My husband/partner is always supportive if I make decisions to take my sick newborn to treatment           | 0.8***                       |
| Q421                                                                                | I can make decisions concerning household resources and my family                                          | 0.82***                      |

\*\*\* indicates p<0.001

<https://doi.org/10.1371/journal.pone.0209959.t002>

**Table 3. Standardized estimated parameters for the structural model (Equation 1–5), northwest Ethiopia, 2016.**

| Path (n = 2158)                 | Parameter    | Standardized estimate |
|---------------------------------|--------------|-----------------------|
| KDS→TSI                         | $\beta_1$    | 0.40**                |
| PPBHCP→TSI                      | $\beta_2$    | 0.08**                |
| SES→TSI                         | $\beta_3$    | -0.002                |
| Number of ANC attendance→TSI    | $\beta_4$    | 0.015                 |
| HLWE→TSI                        | $\beta_5$    | 0.18**                |
| ADHF→TSI                        | $\beta_6$    | -0.009                |
| PCT→TSI                         | $\beta_7$    | 0.057**               |
| PPBHCP→KDS                      | $\beta_8$    | 0.37**                |
| SES→KDS                         | $\beta_9$    | 0.05**                |
| Number of ANC attendance→KDS    | $\beta_{10}$ | 0.05**                |
| HLWE→KDS                        | $\beta_{11}$ | 0.36**                |
| SES→PPBHCP                      | $\beta_{12}$ | 0.004                 |
| Number of ANC attendance→PPBHCP | $\beta_{13}$ | 0.14**                |
| HLWE→PPBHCP                     | $\beta_{14}$ | 0.26**                |
| SES→HLWE                        | $\beta_{15}$ | 0.13**                |
| SES→number of ANC attendance    | $\beta_{16}$ | 0.08**                |

\*\* =  $p < 0.05$ , broken arrows show direction of influence

<https://doi.org/10.1371/journal.pone.0209959.t003>

This study hypothesized a theoretical model of relationships among variables that determine TSI of mothers for newborn danger signs. The model fitted the sample data and explained 31% of the variance in TSI. This suggests the applicability of the model in explaining TSI in similar settings.

According to the results of this study, PPBHCP, HLWE, KDS and PCT were directly associated with TSI. Indirectly, number of ANC attendance, PPBHCP and HLWE affected TSI through their direct effects on KDS. SES did not show a direct effect on TSI. However, it showed effect on TSI through three different pathways; KDS, number of ANC and HLWE.

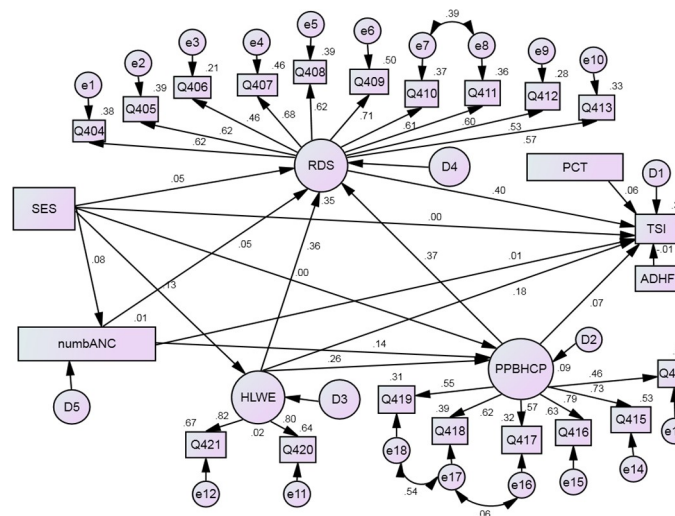

**Fig 2. Revised model and standardized estimates for maternal treatment seeking intention for neonatal danger signs northwest Ethiopia, 2016.** Path coefficient (above or right side of arrows), factor loadings (above or right side of arrows), and  $R^2$  (next to observed variables and on the right and above latent variables).

<https://doi.org/10.1371/journal.pone.0209959.g002>

The direct effect of PPBHCP on TSI is in line with a study in India which reported the influence of clients' perceptions of health care providers behavior on service satisfaction and treatment seeking[51]. Other studies also showed significant association between how consumers view health care providers' and treatment seeking behavior[50,52]. However, these studies assessed the direct effect of caretakers' perception of health care providers on treatment seeking.

A systematic review of studies showed negative influence of health service providers' behavior on provider-patient communication deterring patients from asserting their needs for information and explanations [53]. The indirect influence of PPBHCP on TSI through KDS could be due to the importance of health care providers as source of health information to mothers. If negative perception toward health care providers affects provider-clients communication, there will be reduced opportunity for health workers to inform clients about dangers signs.

Disrespect and abuse of patients by health care providers may also act as more powerful deterrents to care seeking than geographic and financial obstacles[54]. Since PPBHCP in this study is measured by the dimensions of disrespect and abuse, low scores on PPBHCP relates to low treatment seeking given its direct and indirect association with TSI. In this regard, the Health Sector Transformation Plan (HSTP) of the government of Ethiopia gives focus on compassionate and respectful care (CRC) [55]. The focus on CRC may contribute to better provider-client communication, maternal knowledge of danger signs and improved treatment seeking for newborns danger signs.

The positive and significant association between KDS and TSI is also in agreement with studies conducted in Uganda and India[51,56]. Both studies recommended, based on their findings, the importance of raising awareness on neonatal danger signs to improve treatment seeking. A study in Nigeria and Ethiopia also reported significant association between maternal knowledge of danger signs in children and subsequent treatment seeking behavior[25,57]. This calls for the need to strengthen maternal awareness of newborn danger signs using available contact points within the community and during antenatal, delivery and postnatal care.

In our study, number of ANC attendance was associated with KDS and PPBHCP. This could be attributable to the opportunities created during ANC visits to meet with health care providers. This is because ANC visits allow mothers to interact and form opinions about health care providers. ANC visits can be used as opportunities to pass messages on about newborn danger signs and create lasting positive attitude towards health care providers through promotion of compassionate and respectful care.

This study also showed a significant positive effect of HLWE on maternal TSI for newborn danger signs. Even though some studies indicate that empowered women are more likely to seek treatment compared to women who are not [34,35], the studies didn't differentiate whether empowerment of women equally affect treatment seeking for their newborns. Some studies reported the direct effects of income and distance on treatment seeking behavior [11,33]. However, these studies reported no significant direct relationship between SES and ADHF with TSI. The difference in the case of income could be attributed to the difference in which income and SES were assessed in our study and the other studies. In addition, these studies assessed the effect of income on treatment seeking behavior (the practice), whereas our study assessed treatment seeking intention; what the mother would do if she were to see danger signs in newborns.

Although SES was not directly affecting mothers' TSI, it was significantly associated with number of ANC attendance, KDS and HLWE influencing TSI indirectly. This suggests that better SES can serve as an enabling factor in influencing treatment seeking through its impact on other factors

## Limitation of the study

This study used a Five Point Likert Scale for the sake of simplicity. This is because higher scales (i.e. 10 or more scales) could be difficult to answer taking the differences in the scale in to account given the level of illiteracy in the study area. However, higher scales of measurement could have captured additional variances which may have resulted in higher correlation coefficient estimates. Hence, there could be a chance of committing a type II error.

Treatment seeking intention has been measured as a proxy to actual practice. Treatment seeking intention and recognition of danger signs could be different when mothers actually have newborns with danger signs. Hence, a prospective follow up study could give more information than a cross sectional study.

## Conclusion

The proposed theoretical model can be used to model treatment seeking intention in similar settings. The model indicates the network of factors and their direct and indirect pathways of influence on TSI for neonatal danger signs.

It is very important to raise awareness of danger signs at all levels including messages on neonatal danger signs during antenatal care to improve mothers' knowledge of newborn danger signs. Implementing compassionate and respectful care and empowering women should be strengthened in Ethiopia to improve treatment seeking for newborn illnesses.

## Author Contributions

**Conceptualization:** Tariku Nigatu Bogale.

**Data curation:** Tariku Nigatu Bogale.

**Formal analysis:** Tariku Nigatu Bogale, Abebaw Gebeyehu Worku, Alemayehu Worku Yalew.

**Investigation:** Tariku Nigatu Bogale, Alemayehu Worku Yalew, Gashaw Andargie Bikis, Zemene Tigabu Kebede.

**Methodology:** Tariku Nigatu Bogale, Abebaw Gebeyehu Worku, Alemayehu Worku Yalew.

**Project administration:** Abebaw Gebeyehu Worku, Zemene Tigabu Kebede.

**Resources:** Tariku Nigatu Bogale, Abebaw Gebeyehu Worku, Zemene Tigabu Kebede.

**Software:** Tariku Nigatu Bogale.

**Supervision:** Tariku Nigatu Bogale, Abebaw Gebeyehu Worku, Gashaw Andargie Bikis.

**Validation:** Tariku Nigatu Bogale.

**Writing – original draft:** Tariku Nigatu Bogale.

**Writing – review & editing:** Tariku Nigatu Bogale, Abebaw Gebeyehu Worku, Alemayehu Worku Yalew, Gashaw Andargie Bikis, Zemene Tigabu Kebede.

## References

1. Bay G, Miller T, Fajjer DJ. Levels and Trends in Child Mortality: estimates developed by the UN inter-agency group for child Mortality Estimation. 2014.
2. UN. Every newborn: an draft action plan to end preventable deaths. 2014.
3. The Lancet. An Executive Summary for The Lancet 's Series "A healthy start is central to the human life course, with birth holding the highest risk of death, disability, and loss of development potential, leading to major societal effects." 2014. 1–8 p.

4. Tran HT, Doyle LW, Lee KJ, Graham SM. A systematic review of the burden of neonatal mortality and morbidity in the ASEAN Region. *East Asia J Public Heal South*. 2012; 1(3):239–48.
5. WHO, unicef. WHO/UNICEF Joint Statement: Home visits for the newborn child: a strategy to improve survival. 2009. 8 p.
6. EPHI. Countdown to 2015: Ethiopia's progress towards reduction in under five mortality. 2014 Country Case Study. MOH, Countdown to 2015, unicef. 2015.
7. Li C, Yan H, Zeng L, Dibley MJ, Wang D. Predictors for neonatal death in the rural areas of Shaanxi Province of Northwestern China: a cross-sectional study. *BMC Public Health*. 2015;1–8. <https://doi.org/10.1186/1471-2458-15-1>
8. Olayinka O. Predictors of Neonatal Morbidity and Mortality in Tertiary Hospital in Ogun. *Arch Appl Science Res*. 2012; 4(3):1511–6.
9. Lassi ZS, Dean S V, Mallick D, Bhutta ZA. Preconception care: delivery strategies and packages for care. *Reprod Health [Internet]*. 2014; 11(Suppl 3):S7. Available from: <http://www.reproductive-health-journal.com/content/11/S3/S7>
10. Geldsetzer P, Williams TC, Kirolos A, Mitchell S, Ratcliffe LA, Kohli-lynnch MK, et al. The Recognition of and Care Seeking Behaviour for Childhood Illness in Developing Countries: A Systematic Review. *PLoS One*. 2014; 9(4):1–14.
11. Herbert HK, Lee AC, Chandran A, Rudan I, Baqui AH. Care seeking for neonatal illness in low- and middle-income countries: A systematic review. *PLoS Med*. 2012; 9(3).
12. Shaikh BT, Hatcher J. Health seeking behaviour and health service utilization in Pakistan: challenging the policy makers. *J Public Health (Bangkok)*. 2005;Vol. 27(1):49–54.
13. Srivastava NM, Awasthi S, Agarwal GG. Care-seeking behavior and out-of-pocket expenditure for sick prospective follow-up study. *BioMed Cent*. 2009; 10:1–10.
14. Lee W, Neo A, Tan S, Cook AR, Wong ML, Tan J, et al. Health-seeking behaviour of male foreign migrant workers living in a dormitory in Singapore. *BMC Health Serv Res*. 2014; 14(1):1–10.
15. Martinez AM, Thi D, Khu K, Boo NY, Neou L, Saysanasongkham B, et al. Barriers to neonatal care in developing countries: Parents ' and providers ' perceptions. *J Paediatr Child Health*. 2012; 48:852–8. <https://doi.org/10.1111/j.1440-1754.2012.02544.x> PMID: 22970681
16. Srivastava NM, Awasthi S, Mishra R. Neonatal morbidity and care-seeking behavior in urban Lucknow. *Indian Pediatr*. 2008; 45(3):229–32. PMID: 18367771
17. WHO. Caring for the Newborn at Home: A training course for community health workers—Facilitator Guide Unit 2: Home Visits After Birth. 2012;1–151. Available from: [http://www.who.int/maternal\\_child\\_adolescent/news/events/2012/Facilitator\\_Guide\\_Unit2.pdf](http://www.who.int/maternal_child_adolescent/news/events/2012/Facilitator_Guide_Unit2.pdf)
18. Save the Children. Applying the Three Delays Model: Improving access to care for newborns with danger signs. 2013.
19. Tadala T, Hara K. KNOWLEDGE, ATTITUDE AND TREATMENT PREFERENCES FOR NEONATAL SEPSIS IN NTCHISI DISTRICT By. 2011.
20. MoH. Family Health Card: Federal Democratic Republic of Ethiopia. 2016.
21. CSA. Ethiopia Demographic and Health Survey, 2011 [Internet]. Central Statistical Agency Addis Ababa, Ethiopia ICF international Calverton, Maryland, USA. 2011. Available from: [http://www.measuredhs.com/pubs/pub\\_details.cfm?ID=596&srchTp=type%5Cnhhttp://scholar.google.com/scholar?hl=en&btnG=Search&q=intitle:Ethiopia+Demographic+and+Health+Survey#4](http://www.measuredhs.com/pubs/pub_details.cfm?ID=596&srchTp=type%5Cnhhttp://scholar.google.com/scholar?hl=en&btnG=Search&q=intitle:Ethiopia+Demographic+and+Health+Survey#4)
22. Warren C. Care of the newborn: Community perceptions and health seeking behavior. *Ethiop J Heal Dev*. 2010;(Special Issue 1):110–4.
23. Amare Y, Degefe T, Mulligan B. Original article Newborn care seeking practices in Central and Southern Ethiopia and implications for community based programming. *Ethiop J Heal Dev*. 2008; 27:3–7.
24. Shewasinad S. Assessment of mothers/Caregivers health care seeking behavior for childhood illnesses in rural Ensaro district, north shoa Zone, Amhara region, Ethiopia, 2014. 2014;
25. Wondowosen K, Tachebele E. Assessment of Health Seeking Behavior and Associated Factors for Genreal Danger Signs among Mothers of Underfive Children in Bishoftu Town, East Shoa Zone, Oromia, Ethiopia, 2016. 2016.
26. Molla G, Gonie A, Belachew T, Admasu B. Health Care Seeking Behaviour on Neonatal Danger Signs among Mothers in Tenta District, Northeast Ethiopia: Community based cross-sectional study. *Int J Nurs Midwifery*. 2017; 9(July):85–93.
27. Shah R, Mullany LC, Darmstadt GL, Talukder RR, Rahman SM. Determinants and pattern of care seeking for preterm newborns in a rural Bangladeshi cohort. *BMC Health Serv Res*. 2014;1–12. <https://doi.org/10.1186/1472-6963-14-1>

28. Federal Republic of Ethiopia Population Census and commission. Summary and Statistical Report of the 2007 population and housing census: population size by age and sex. 2008.
29. Central statistical Authority. Federal Democratic Republic of Ethiopia Central Statistical Agency Population Projection of Ethiopia for All Regions At Wereda Level from 2014–2017. 2017.
30. Nigatu SG, Worku AG, Dadi AF. Level of mother's knowledge about neonatal danger signs and associated factors in North West of Ethiopia: a community based study. *BMC Res Notes* [Internet]. 2015; 8(1):309. Available from: <http://www.biomedcentral.com/1756-0500/8/309>
31. Wilunda C, Quaglio G, Putoto G, Takahashi R, Calia F, Abebe D, et al. Determinants of utilisation of antenatal care and skilled birth attendant at delivery in South West Shoa Zone, Ethiopia: a cross sectional study. *Reprod Health*. 2015;1–12. <https://doi.org/10.1186/1742-4755-12-1>
32. Rajamohanan KPillaiSankey VWilliamsbHenry AGlickcDanielPolskydJesse ABerlineRobert ALowef. Factors affecting decisions to seek treatment for sick children in Kerala, India. *Soc Sci Med*. 57(5):783–90. PMID: [12850106](https://pubmed.ncbi.nlm.nih.gov/12850106/)
33. Davis J, Luchters S, Holmes W. Men and maternal and newborn health. Briefing paper. 2013.
34. Wado YD. Women's Autonomy and Reproductive Healthcare-Seeking Behavior in Ethiopia. *DHS*. 2013;(91).
35. Malnuddin A, Begum HA, Rawal LB, Islam A, Islam SS. Women E mpowerment and Its R elation with Health Seeking Behavior in Bangladesh. *J Fam Reprod Heal*. 2015; 9(2):65–73.
36. Sheeran A. Intention—Behavior Relations: A Conceptual and Empirical Review *European Review of Social Psychology*. *Eur Rev Soc Psychol*. 2002;(January).
37. Wilson CJ, Deane FP. Measuring help seeking intentions: Properties of the General Help Seeking Questionnaire Measuring help seeking intentions: Properties of the General Help Seeking. *Can J Couns*. 2005; 39:15–28.
38. Webb TL. Does Changing Behavioral Intentions Engender Behavior Change? A Meta-Analysis of the Experimental Evidence. *Am Psychol Assoc*. 2006; 132(2):249–68.
39. Violato C, Hecker KG. How to use structural Equation modeling in Medical Education Research: A Bried Guide. Medical Education Research Unit, University of Calgary, Calcary, Alberta, Canada. *Teachning Learn Med*. 9(4):362–71.
40. Hill K. Exploring Evidence for Disrespect and Abuse in Facility-Based Childbirth Report of a Landscape Analysis. 2010.
41. Tavakol M, Dennick R. Making sense of Cronbach ' s alpha. *Int J Med Educ*. 2011;53–5. <https://doi.org/10.5116/ijme.4dfb.8dfd> PMID: [28029643](https://pubmed.ncbi.nlm.nih.gov/28029643/)
42. Schumacker RE, Lomax RG. A beginner ' s guide to structural equation modeling; third edition.2010
43. Hooper D, Coughlan J, Mullen M. Structural Equation Modelling: Guidelines for Determining Model Fit *Structural equation modelling: guidelines for determining model fit*. 2008; 6(1):53–60.
44. Livote E. Introduction to Structural Equation Modeling Using SPSS and AMOS. Niels J. Blunch. Thousand Oaks, CA: Sage, 2008, 270 pages, \$39.95. *Struct Equ Model A Multidiscip J*. 2009; 16(3):556–60.
45. Nonyane BAS, Kazmi N, Koffi AK, Begum N, Ahmed S, Abdullah H. Factors associated with delay in care-seeking for fatal neonatal illness in the Sylhet district of Bangladesh: results from a verbal and social autopsy study. *J Glob Health*. 2016; 6(1).
46. Ba A. Mothers ' recognition of newborn danger signs and health seeking behaviour. 2014; 41(3):199–203.
47. Indongo N. RISK FACTORS AND CAUSES OF NEONATAL DEATHS IN NAMIBIA. *Eur Sci J*. 2014; 7881(August):466–71.
48. Waiswa P, Kallander K, Peterson S, Tomson G, Pariyo GW. Using the three delays model to understand why newborn babies die in eastern Uganda. 2010; 15(8):964–72.
49. Upadhyay RP, Rai SK, Krishnan A. Using three delays model to understand the social factors responsible for neonatal deaths in rural Haryana, India. *J Trop Pediatr*. 2013; 59(2):100–5. <https://doi.org/10.1093/tropej/fms060> PMID: [23174990](https://pubmed.ncbi.nlm.nih.gov/23174990/)
50. Bahrami MA, Atashbahar O, Asqari R. The Survey of Treatment Seeking Behavior among the Population of Yazd, Iran-2013. *World J Med Sci*. 2013; 9(2):102–8.
51. Dongre AR, Deshmukh PR, Garg BS. Awareness and health care seeking for newborn danger signs among mothers in peri-urban Wardha. *Indian J Pediatr*. 2009; 76(7):691–3. <https://doi.org/10.1007/s12098-009-0106-1> PMID: [19381514](https://pubmed.ncbi.nlm.nih.gov/19381514/)
52. Mannava P, Durrant K, Fisher J, Chersich M, Luchters S. Attitudes and behaviours of maternal health care providers in interactions with clients: a systematic review. *Global Health*. 2015; 11(36):1–17.

53. Ha JF, Hons M, Anat DS, Longnecker N. Doctor-Patient Communication: A Review. *Ochsner J.* 2010; 10:38–43. PMID: [21603354](https://pubmed.ncbi.nlm.nih.gov/21603354/)
54. Bowser D, Hill K. Exploring evidences for disrespect and Abuse in facility based Child Birth. Report of Landscape analysis. USAID-TRAction Project.
55. MOH. Health Sector Transformation Plan (HSTP). 2015/16-2019/20. 2015.
56. Sandberg J, Pettersson KO, Asp G, Kabakyenga J, Agardh A. Inadequate Knowledge of Neonatal Danger Signs among Recently Delivered Women in Southwestern Rural Uganda: A Community Survey. *PLoS One* [Internet]. 2014; 9(5). Available from: [https://doi.org/10.1016/S0277-9536\(02\)00448-3](https://doi.org/10.1016/S0277-9536(02)00448-3) Get rights and content
57. Ekwochi U, Ndu IK, Osuorah CDI, Amadi OF, Okeke IB, Obuoha E, et al. Knowledge of danger signs in newborns and health seeking practices of mothers and care givers in Enugu state, South-East Nigeria. *Ital J Pediatr.* 2015; 41(18):1–7.
